# Supplementary material for: Chemical speciation of PM2.5 particles at urban background and rural sites in the UK atmosphere
Source: Royal Society of Chemistry journal article supplement (doi:10.1039/c000329h), 2010-01-01
Supplement: c000329h.pdf [file c000329h.pdf]

## Supporting Information

# **CHEMICAL SPECIATION OF PM<sub>2.5</sub> PARTICLES AT URBAN BACKGROUND AND RURAL SITES IN THE UK ATMOSPHERE**

**Roy M. Harrison\* and Jianxin Yin**

### **Table S1. Abbreviations for individual organic marker compounds**

---

**\* To whom correspondence should be addressed**

Division of Environmental Health & Risk Management, School of Geography, Earth & Environmental Sciences,  
University of Birmingham, Edgbaston, Birmingham B15 2TT, United Kingdom

Tel: +44 (0)121 41 43494; Fax: +44 (0)121 41 43709; email: r.m.harrison@bham.ac.uk

| Analyte                         | Abbreviation | Analyte                                                    | Abbreviation          |
|---------------------------------|--------------|------------------------------------------------------------|-----------------------|
| <b><i>PAHs</i></b>              |              | <b><i>Alkanes</i></b>                                      |                       |
| Benz[de]anthracen-7-one         | B[de]AO      | <i>n</i> -Tetracosane                                      | C24                   |
| Benz[a]anthracene-7,12-dione    | B[a]ADIO     | <i>n</i> -Pentacosane                                      | C25                   |
| Benzo[b]fluoranthene            | B[b]F        | <i>n</i> -Hexacosane                                       | C26                   |
| Benzo[k]fluoranthene            | B[k]F        | <i>n</i> -Heptacosane                                      | C27                   |
| Benzo[e]pyrene                  | B[e]P        | <i>n</i> -Octacosane                                       | C28                   |
| Benzo[a]pyrene                  | B[a]P        | <i>n</i> -Nonacosane                                       | C29                   |
| Perylene                        | PER          | <i>n</i> -Triacontane                                      | C30                   |
| Indeno[1,2,3-cd]fluoranthene    | IF           | <i>n</i> -Hentriacontane                                   | C31                   |
| Indeno[1,2,3-cd]pyrene          | IP           | <i>n</i> -Dotriacontane                                    | C32                   |
| Dibenz[a,h]anthracene           | D[ah]A       | <i>n</i> -Tritriacontane                                   | C33                   |
| Picene/Dibenzo[a,i]phenanthrene | PIC          | <i>n</i> -Tetratriacontane                                 | C34                   |
| Benzo[ghi]perylene              | B[ghi]PER    | <i>n</i> -Pentatriacontane                                 | C35                   |
| Coronene                        | COR          |                                                            |                       |
| <b><i>Acids</i></b>             |              | <b><i>Hopanes</i></b>                                      |                       |
| Butanedioic acid                | ButDiA       | 17 $\alpha$ (H)-22,29,30-Trisnorhopane                     | 17 $\alpha$ TNohop    |
| Pentanedioic acid               | PentDiA      | 17 $\alpha$ (H),21 $\beta$ (H)-30-norhopane                | 17 $\alpha$ Nohop     |
| Hexanedioic acid                | HexDiA       | 17 $\alpha$ (H),21 $\beta$ (H)-Hopane                      | 17 $\alpha$ Hop       |
| Heptanedioic acid               | HeptDiA      | 22S-17 $\alpha$ (H),21 $\beta$ (H)-30-Homohopane           | 22S $\alpha\beta$ HH  |
| Octanedioic acid                | OctDiA       | 22R-17 $\alpha$ (H),21 $\beta$ (H)-30-Homohopane           | 22R $\alpha\beta$ HH  |
| Nonanedioic acid                | NonDiA       | 22S-17 $\alpha$ (H),21 $\beta$ (H)-30-Bishomohopane        | 22S $\alpha\beta$ BHH |
| 1,2-Benzenedicarboxylic acid    | 1,2BZDiA     | 22R-17 $\alpha$ (H),21 $\beta$ (H)-30-Bishomohopane        | 22R $\alpha\beta$ BHH |
| 1,4-Benzenedicarboxylic acid    | 1,4BZDiA     | 22S-17 $\alpha$ (H),21 $\beta$ (H)-30,31,32-trishomohopane | 22S $\alpha\beta$ THH |
| 1,3-Benzenedicarboxylic acid    | 1,3BZDiA     | 22R-17 $\alpha$ (H),21 $\beta$ (H)-30,31,32-trishomohopane | 22R $\alpha\beta$ THH |
| 1,2,3-Benzenetricarboxylic acid | 1,2,3BZTrA   |                                                            |                       |
| 1,2,4-Benzenetricarboxylic acid | 1,2,4BZTrA   | <b><i>Sterols</i></b>                                      |                       |
| 1,3,5-Benzenetricarboxylic acid | 1,3,5BZTrA   | Levoglucosan                                               | Levo                  |
| Pimaric acid                    | PimaA        | Cholesterol                                                | Chol                  |
| Isopimaric acid                 | IsoPimaA     |                                                            |                       |

**Table S2. Inter-species correlation for *n*-alkanes at EROS (bottom) and CPSS (top)**

|              | <i>PM2.5</i> | <i>SO4</i>  | <i>NO3</i> | <i>OC</i>   | <i>EC</i>   | <i>TC</i>   | <i>C24</i>  | <i>C25</i>  | <i>C26</i>  | <i>C27</i>  | <i>C28</i>  | <i>C29</i>  | <i>C30</i>  | <i>C31</i>   | <i>C32</i>  | <i>C33</i>  | <i>C34</i>  | <i>C35</i> |
|--------------|--------------|-------------|------------|-------------|-------------|-------------|-------------|-------------|-------------|-------------|-------------|-------------|-------------|--------------|-------------|-------------|-------------|------------|
| <i>PM2.5</i> |              | 0.90        | 0.54       | 0.40        | -0.08       | 0.27        | -0.33       | 0.04        | -0.32       | 0.08        | -0.21       | -0.21       | -0.13       | <b>-0.41</b> | -0.25       | -0.14       | -0.35       | 0.25       |
| <i>SO4</i>   | 0.90         |             | 0.26       | 0.17        | -0.24       | 0.01        | -0.32       | 0.11        | -0.27       | 0.10        | -0.21       | -0.08       | -0.17       | -0.35        | -0.20       | -0.26       | -0.26       | 0.16       |
| <i>NO3</i>   | 0.81         | 0.55        |            | 0.29        | 0.04        | 0.23        | -0.11       | -0.06       | -0.36       | -0.05       | -0.20       | -0.30       | 0.01        | -0.35        | -0.25       | -0.16       | -0.34       | 0.27       |
| <i>OC</i>    | 0.78         | 0.46        | 0.74       |             | 0.19        | 0.87        | 0.04        | <b>0.44</b> | 0.19        | <b>0.64</b> | 0.28        | 0.10        | 0.30        | 0.08         | 0.11        | <b>0.56</b> | -0.34       | 0.16       |
| <i>EC</i>    | 0.20         | -0.12       | 0.17       | 0.47        |             | 0.60        | 0.10        | -0.13       | 0.03        | -0.16       | -0.04       | -0.36       | -0.08       | -0.18        | -0.09       | -0.19       | -0.08       | -0.25      |
| <i>TC</i>    | 0.68         | 0.30        | 0.62       | 0.94        | 0.75        |             | 0.00        | 0.23        | 0.09        | <b>0.41</b> | 0.10        | -0.13       | 0.11        | 0.02         | -0.05       | 0.34        | -0.30       | -0.02      |
| <i>C24</i>   | 0.14         | -0.01       | 0.11       | 0.37        | <b>0.51</b> | <b>0.48</b> |             | 0.26        | <b>0.63</b> | 0.04        | <b>0.64</b> | 0.13        | <b>0.62</b> | 0.12         | <b>0.59</b> | 0.23        | 0.05        | 0.15       |
| <i>C25</i>   | 0.25         | 0.09        | 0.21       | <b>0.53</b> | 0.18        | <b>0.47</b> | <b>0.59</b> |             | <b>0.51</b> | <b>0.87</b> | <b>0.46</b> | <b>0.49</b> | 0.38        | 0.12         | 0.36        | 0.18        | 0.02        | 0.13       |
| <i>C26</i>   | 0.18         | -0.01       | 0.09       | <b>0.43</b> | <b>0.41</b> | <b>0.48</b> | <b>0.62</b> | <b>0.47</b> |             | 0.31        | <b>0.87</b> | 0.17        | <b>0.74</b> | 0.32         | <b>0.84</b> | <b>0.48</b> | 0.24        | 0.30       |
| <i>C27</i>   | 0.25         | 0.17        | 0.18       | <b>0.49</b> | -0.05       | 0.35        | 0.34        | 0.91        | 0.22        |             | 0.33        | <b>0.58</b> | 0.28        | 0.25         | 0.19        | 0.39        | -0.09       | 0.01       |
| <i>C28</i>   | 0.38         | -0.04       | 0.31       | <b>0.54</b> | <b>0.85</b> | <b>0.74</b> | <b>0.64</b> | 0.33        | <b>0.57</b> | 0.05        |             | 0.17        | <b>0.90</b> | 0.31         | <b>0.91</b> | <b>0.50</b> | 0.10        | 0.23       |
| <i>C29</i>   | -0.26        | -0.15       | -0.06      | -0.01       | -0.29       | -0.12       | 0.28        | <b>0.44</b> | 0.15        | <b>0.54</b> | -0.15       |             | 0.14        | 0.37         | 0.01        | 0.27        | 0.34        | -0.13      |
| <i>C30</i>   | -0.01        | -0.24       | 0.11       | 0.33        | <b>0.52</b> | <b>0.46</b> | 0.33        | 0.02        | <b>0.47</b> | -0.14       | <b>0.47</b> | -0.13       |             | 0.35         | <b>0.84</b> | <b>0.44</b> | 0.02        | 0.24       |
| <i>C31</i>   | 0.08         | 0.28        | -0.08      | 0.08        | -0.03       | 0.05        | 0.20        | 0.03        | 0.11        | 0.02        | -0.04       | 0.32        | 0.06        |              | <b>0.42</b> | <b>0.43</b> | <b>0.47</b> | 0.01       |
| <i>C32</i>   | 0.39         | <b>0.53</b> | 0.11       | 0.13        | 0.06        | 0.12        | 0.35        | 0.03        | 0.06        | -0.07       | 0.11        | -0.04       | -0.09       | <b>0.68</b>  |             | <b>0.41</b> | 0.14        | 0.28       |
| <i>C33</i>   | 0.26         | 0.28        | 0.26       | 0.22        | 0.09        | 0.20        | <b>0.51</b> | 0.29        | 0.02        | 0.22        | 0.21        | 0.30        | -0.05       | <b>0.53</b>  | <b>0.68</b> |             | -0.03       | 0.34       |
| <i>C34</i>   | -0.19        | -0.11       | -0.32      | -0.14       | 0.11        | -0.06       | 0.34        | 0.17        | 0.02        | 0.17        | 0.03        | 0.38        | 0.15        | 0.36         | 0.22        | 0.35        |             | 0.01       |
| <i>C35</i>   | 0.04         | -0.07       | -0.01      | 0.19        | <b>0.55</b> | 0.37        | <b>0.46</b> | 0.03        | 0.26        | -0.16       | <b>0.47</b> | -0.17       | <b>0.54</b> | <b>0.42</b>  | <b>0.43</b> | <b>0.45</b> | <b>0.53</b> |            |

**Table S3. Inter-species correlation for hopanes at EROS (bottom) and CPSS (top)**

|                  | <i>PM2.5</i> | <i>SO4</i> | <i>NO3</i> | <i>OC</i>   | <i>EC</i>   | <i>TC</i>   | <i>17aTNohop</i> | <i>17aNohop</i> | <i>17aHop</i> | <i>22SabHH</i> | <i>22RabHH</i> | <i>22SabBHH</i> | <i>22RabBHH</i> | <i>22SabTHH</i> | <i>22RabTHH</i> |
|------------------|--------------|------------|------------|-------------|-------------|-------------|------------------|-----------------|---------------|----------------|----------------|-----------------|-----------------|-----------------|-----------------|
| <i>PM2.5</i>     |              | 0.90       | 0.54       | 0.40        | -0.08       | 0.27        | <b>0.50</b>      | 0.21            | 0.38          | <b>0.43</b>    | 0.39           | <b>0.48</b>     | <b>0.45</b>     | <b>0.43</b>     | <b>0.46</b>     |
| <i>SO4</i>       | 0.90         |            | 0.26       | 0.17        | -0.24       | 0.01        | <b>0.41</b>      | 0.20            | 0.30          | 0.35           | 0.25           | 0.39            | 0.35            | 0.35            | 0.37            |
| <i>NO3</i>       | 0.81         | 0.55       |            | 0.29        | 0.04        | 0.23        | 0.37             | 0.02            | 0.25          | 0.28           | 0.21           | 0.30            | 0.31            | 0.32            | 0.34            |
| <i>OC</i>        | 0.78         | 0.46       | 0.74       |             | 0.19        | 0.87        | 0.21             | 0.13            | 0.10          | 0.17           | 0.39           | 0.18            | 0.15            | 0.10            | 0.12            |
| <i>EC</i>        | 0.20         | -0.12      | 0.17       | 0.47        |             | 0.60        | 0.19             | 0.05            | 0.00          | 0.02           | 0.08           | -0.02           | -0.01           | -0.08           | -0.06           |
| <i>TC</i>        | 0.68         | 0.30       | 0.62       | 0.94        | 0.75        |             | 0.27             | 0.16            | 0.09          | 0.15           | 0.35           | 0.13            | 0.11            | 0.04            | 0.06            |
| <i>17aTNohop</i> | 0.30         | 0.02       | 0.29       | <b>0.42</b> | <b>0.76</b> | <b>0.62</b> |                  | <b>0.79</b>     | <b>0.79</b>   | <b>0.78</b>    | <b>0.71</b>    | <b>0.78</b>     | <b>0.77</b>     | <b>0.75</b>     | <b>0.74</b>     |
| <i>17aNohop</i>  | 0.24         | -0.09      | 0.23       | <b>0.41</b> | <b>0.85</b> | <b>0.65</b> | <b>0.95</b>      |                 | <b>0.89</b>   | <b>0.87</b>    | <b>0.84</b>    | <b>0.84</b>     | <b>0.83</b>     | <b>0.80</b>     | <b>0.79</b>     |
| <i>17aHop</i>    | 0.20         | -0.12      | 0.20       | <b>0.41</b> | <b>0.87</b> | <b>0.66</b> | <b>0.94</b>      | <b>0.99</b>     |               | <b>0.98</b>    | <b>0.90</b>    | <b>0.98</b>     | <b>0.98</b>     | <b>0.97</b>     | <b>0.97</b>     |
| <i>22SabHH</i>   | 0.21         | -0.13      | 0.21       | <b>0.47</b> | <b>0.87</b> | <b>0.70</b> | <b>0.91</b>      | <b>0.98</b>     | <b>0.99</b>   |                | <b>0.90</b>    | <b>0.99</b>     | <b>0.99</b>     | <b>0.97</b>     | <b>0.97</b>     |
| <i>22RabHH</i>   | 0.15         | -0.17      | 0.18       | 0.39        | <b>0.88</b> | <b>0.65</b> | <b>0.91</b>      | <b>0.99</b>     | <b>0.99</b>   | <b>0.99</b>    |                | <b>0.91</b>     | <b>0.91</b>     | <b>0.88</b>     | <b>0.90</b>     |
| <i>22SabBHH</i>  | 0.21         | -0.14      | 0.20       | <b>0.43</b> | <b>0.86</b> | <b>0.67</b> | <b>0.91</b>      | <b>0.97</b>     | <b>0.98</b>   | <b>0.98</b>    | <b>0.99</b>    |                 | <b>0.99</b>     | <b>0.99</b>     | <b>0.99</b>     |
| <i>22RabBHH</i>  | 0.23         | -0.13      | 0.20       | <b>0.44</b> | <b>0.87</b> | <b>0.67</b> | <b>0.90</b>      | <b>0.98</b>     | <b>0.99</b>   | <b>0.98</b>    | <b>0.99</b>    | <b>1.00</b>     |                 | <b>0.99</b>     | <b>0.99</b>     |
| <i>22SabTHH</i>  | 0.23         | -0.11      | 0.20       | <b>0.42</b> | <b>0.85</b> | <b>0.65</b> | <b>0.90</b>      | <b>0.96</b>     | <b>0.98</b>   | <b>0.97</b>    | <b>0.98</b>    | <b>0.99</b>     | <b>0.99</b>     |                 | <b>0.99</b>     |
| <i>22RabTHH</i>  | 0.20         | -0.14      | 0.17       | <b>0.41</b> | <b>0.85</b> | <b>0.64</b> | <b>0.90</b>      | <b>0.97</b>     | <b>0.98</b>   | <b>0.97</b>    | <b>0.98</b>    | <b>0.99</b>     | <b>0.99</b>     | <b>0.99</b>     |                 |

**Table S4. Inter-species correlation for PAHs at EROS (bottom) and CPSS (top)**

|           | <i>PM2.5</i> | <i>SO4</i>  | <i>NO3</i>  | <i>OC</i>   | <i>EC</i>   | <i>TC</i>   | <i>B[de]AO</i> | <i>B[a]ADIO</i> | <i>B[b]F</i> | <i>B[k]F</i> | <i>B[e]P</i> | <i>B[a]P</i> | <i>PER</i>  | <i>IF</i>   | <i>IP</i>   | <i>D[ah]A</i> | <i>PIC</i>  | <i>B[ghi]PER</i> | <i>COR</i>  |
|-----------|--------------|-------------|-------------|-------------|-------------|-------------|----------------|-----------------|--------------|--------------|--------------|--------------|-------------|-------------|-------------|---------------|-------------|------------------|-------------|
| PM2.5     |              | 0.90        | 0.54        | 0.40        | -0.08       | 0.27        | 0.28           | <b>0.60</b>     | <b>0.60</b>  | <b>0.50</b>  | <b>0.57</b>  | <b>0.40</b>  | 0.37        | 0.35        | <b>0.55</b> | <b>0.49</b>   | 0.29        | <b>0.56</b>      | <b>0.67</b> |
| SO4       | 0.90         |             | 0.26        | 0.17        | -0.24       | 0.01        | 0.03           | <b>0.42</b>     | <b>0.45</b>  | 0.35         | <b>0.41</b>  | 0.26         | 0.24        | 0.16        | <b>0.41</b> | 0.34          | 0.11        | <b>0.40</b>      | <b>0.50</b> |
| NO3       | 0.81         | 0.55        |             | 0.29        | 0.04        | 0.23        | 0.16           | 0.27            | 0.26         | 0.19         | 0.23         | 0.15         | 0.08        | 0.13        | 0.19        | 0.17          | 0.07        | 0.26             | 0.39        |
| OC        | 0.78         | 0.46        | 0.74        |             | 0.19        | 0.87        | <b>0.71</b>    | <b>0.67</b>     | <b>0.60</b>  | <b>0.53</b>  | <b>0.61</b>  | <b>0.51</b>  | <b>0.50</b> | <b>0.59</b> | <b>0.62</b> | <b>0.64</b>   | <b>0.72</b> | <b>0.55</b>      | <b>0.55</b> |
| EC        | 0.20         | -0.12       | 0.17        | 0.47        |             | 0.60        | <b>0.59</b>    | <b>0.48</b>     | <b>0.58</b>  | <b>0.70</b>  | <b>0.62</b>  | <b>0.73</b>  | <b>0.68</b> | <b>0.66</b> | <b>0.58</b> | <b>0.56</b>   | 0.32        | <b>0.64</b>      | <b>0.50</b> |
| TC        | 0.68         | 0.30        | 0.62        | 0.94        | 0.75        |             | <b>0.80</b>    | <b>0.72</b>     | <b>0.71</b>  | <b>0.72</b>  | <b>0.74</b>  | <b>0.72</b>  | <b>0.69</b> | <b>0.74</b> | <b>0.73</b> | <b>0.73</b>   | <b>0.69</b> | <b>0.70</b>      | <b>0.64</b> |
| B[de]AO   | 0.35         | -0.05       | 0.19        | <b>0.48</b> | <b>0.89</b> | <b>0.72</b> |                | <b>0.87</b>     | <b>0.83</b>  | <b>0.85</b>  | <b>0.85</b>  | <b>0.84</b>  | <b>0.83</b> | <b>0.94</b> | <b>0.87</b> | <b>0.90</b>   | <b>0.91</b> | <b>0.82</b>      | <b>0.75</b> |
| B[a]ADIO  | <b>0.72</b>  | 0.38        | <b>0.46</b> | <b>0.73</b> | <b>0.67</b> | <b>0.81</b> | <b>0.82</b>    |                 | <b>0.95</b>  | <b>0.92</b>  | <b>0.94</b>  | <b>0.85</b>  | <b>0.85</b> | <b>0.90</b> | <b>0.96</b> | <b>0.94</b>   | <b>0.81</b> | <b>0.93</b>      | <b>0.91</b> |
| B[b]F     | <b>0.62</b>  | 0.30        | 0.37        | <b>0.63</b> | <b>0.78</b> | <b>0.79</b> | <b>0.88</b>    | <b>0.90</b>     |              | <b>0.98</b>  | <b>0.99</b>  | <b>0.94</b>  | <b>0.92</b> | <b>0.91</b> | <b>0.98</b> | <b>0.95</b>   | <b>0.73</b> | <b>0.98</b>      | <b>0.93</b> |
| B[k]F     | <b>0.47</b>  | 0.12        | 0.26        | <b>0.55</b> | <b>0.84</b> | <b>0.75</b> | <b>0.94</b>    | <b>0.86</b>     | <b>0.97</b>  |              | <b>0.99</b>  | <b>0.97</b>  | <b>0.96</b> | <b>0.94</b> | <b>0.98</b> | <b>0.95</b>   | <b>0.71</b> | <b>0.98</b>      | <b>0.91</b> |
| B[e]P     | <b>0.50</b>  | 0.17        | 0.30        | <b>0.59</b> | <b>0.83</b> | <b>0.77</b> | <b>0.93</b>    | <b>0.86</b>     | <b>0.98</b>  | <b>0.99</b>  |              | <b>0.95</b>  | <b>0.93</b> | <b>0.92</b> | <b>0.99</b> | <b>0.96</b>   | <b>0.74</b> | <b>0.98</b>      | <b>0.92</b> |
| B[a]P     | <b>0.41</b>  | 0.06        | 0.16        | <b>0.49</b> | <b>0.85</b> | <b>0.70</b> | <b>0.94</b>    | <b>0.77</b>     | <b>0.92</b>  | <b>0.95</b>  | <b>0.96</b>  |              | <b>0.98</b> | <b>0.94</b> | <b>0.96</b> | <b>0.94</b>   | <b>0.70</b> | <b>0.96</b>      | <b>0.88</b> |
| PER       | 0.28         | 0.00        | 0.11        | <b>0.42</b> | <b>0.82</b> | <b>0.64</b> | <b>0.90</b>    | <b>0.74</b>     | <b>0.90</b>  | <b>0.93</b>  | <b>0.93</b>  | <b>0.96</b>  |             | <b>0.95</b> | <b>0.94</b> | <b>0.94</b>   | <b>0.73</b> | <b>0.94</b>      | <b>0.88</b> |
| IF        | 0.17         | -0.10       | 0.05        | 0.38        | <b>0.83</b> | <b>0.62</b> | <b>0.95</b>    | <b>0.76</b>     | <b>0.85</b>  | <b>0.93</b>  | <b>0.91</b>  | <b>0.94</b>  | <b>0.93</b> |             | <b>0.94</b> | <b>0.95</b>   | <b>0.84</b> | <b>0.92</b>      | <b>0.85</b> |
| IP        | <b>0.47</b>  | 0.12        | 0.18        | <b>0.52</b> | <b>0.79</b> | <b>0.70</b> | <b>0.94</b>    | <b>0.85</b>     | <b>0.93</b>  | <b>0.95</b>  | <b>0.96</b>  | <b>0.97</b>  | <b>0.93</b> | <b>0.95</b> |             | <b>0.98</b>   | <b>0.78</b> | <b>0.98</b>      | <b>0.94</b> |
| D[ah]A    | <b>0.50</b>  | 0.23        | 0.20        | <b>0.54</b> | <b>0.71</b> | <b>0.69</b> | <b>0.87</b>    | <b>0.87</b>     | <b>0.95</b>  | <b>0.95</b>  | <b>0.95</b>  | <b>0.92</b>  | <b>0.90</b> | <b>0.90</b> | <b>0.96</b> |               | <b>0.86</b> | <b>0.95</b>      | <b>0.90</b> |
| PIC       | <b>0.53</b>  | <b>0.41</b> | 0.21        | <b>0.49</b> | <b>0.57</b> | <b>0.60</b> | <b>0.68</b>    | <b>0.74</b>     | <b>0.86</b>  | <b>0.81</b>  | <b>0.83</b>  | <b>0.80</b>  | <b>0.79</b> | <b>0.73</b> | <b>0.82</b> | <b>0.88</b>   |             | <b>0.70</b>      | <b>0.67</b> |
| B[ghi]PER | 0.25         | -0.06       | 0.11        | <b>0.42</b> | <b>0.80</b> | <b>0.63</b> | <b>0.95</b>    | <b>0.75</b>     | <b>0.84</b>  | <b>0.91</b>  | <b>0.90</b>  | <b>0.96</b>  | <b>0.91</b> | <b>0.95</b> | <b>0.96</b> | <b>0.88</b>   | <b>0.69</b> |                  | <b>0.97</b> |
| COR       | 0.21         | -0.03       | 0.07        | 0.34        | <b>0.67</b> | <b>0.52</b> | <b>0.86</b>    | <b>0.67</b>     | <b>0.76</b>  | <b>0.82</b>  | <b>0.82</b>  | <b>0.89</b>  | <b>0.84</b> | <b>0.90</b> | <b>0.93</b> | <b>0.84</b>   | <b>0.67</b> | <b>0.97</b>      |             |

**Table S5. Inter-species correlation for acids at EROS (bottom) and CPSS (top)**

|                   | <i>PM2.5</i> | <i>SO4</i>  | <i>NO3</i>  | <i>OC</i>   | <i>EC</i>   | <i>TC</i>   | <i>ButDiA</i> | <i>PentDiA</i> | <i>HexDiA</i> | <i>HeptDiA</i> | <i>OctDiA</i> | <i>NonDiA</i> | <i>1,2BZDiA</i> | <i>1,4BZDiA</i> | <i>1,3BZDiA</i> | <i>1,2,3BZTrA</i> | <i>1,2,4BZTrA</i> | <i>1,3,5BZTrA</i> | <i>PimaA</i> | <i>IsoPimaA</i> |
|-------------------|--------------|-------------|-------------|-------------|-------------|-------------|---------------|----------------|---------------|----------------|---------------|---------------|-----------------|-----------------|-----------------|-------------------|-------------------|-------------------|--------------|-----------------|
| <i>PM2.5</i>      |              | 0.90        | 0.54        | 0.40        | -0.08       | 0.27        | <b>0.58</b>   | <b>0.63</b>    | <b>0.54</b>   | 0.30           | 0.15          | 0.05          | <b>0.83</b>     | <b>0.53</b>     | <b>0.40</b>     | <b>0.57</b>       | <b>0.49</b>       | 0.15              | 0.04         | 0.25            |
| <i>SO4</i>        | 0.90         |             | 0.26        | 0.17        | -0.24       | 0.01        | <b>0.55</b>   | <b>0.59</b>    | <b>0.35</b>   | 0.04           | -0.07         | -0.18         | <b>0.84</b>     | <b>0.40</b>     | 0.17            | <b>0.51</b>       | 0.34              | 0.09              | -0.23        | 0.04            |
| <i>NO3</i>        | 0.81         | 0.55        |             | 0.29        | 0.04        | 0.23        | <b>0.60</b>   | <b>0.60</b>    | <b>0.67</b>   | <b>0.42</b>    | 0.10          | 0.01          | 0.22            | 0.10            | 0.33            | 0.36              | <b>0.40</b>       | -0.10             | 0.06         | 0.13            |
| <i>OC</i>         | 0.78         | 0.46        | 0.74        |             | 0.19        | 0.87        | 0.12          | 0.21           | 0.38          | <b>0.67</b>    | <b>0.69</b>   | <b>0.69</b>   | 0.33            | <b>0.63</b>     | <b>0.53</b>     | <b>0.45</b>       | 0.37              | 0.26              | <b>0.68</b>  | <b>0.51</b>     |
| <i>EC</i>         | 0.20         | -0.12       | 0.17        | 0.47        |             | 0.60        | -0.11         | -0.10          | 0.05          | 0.15           | -0.09         | 0.05          | 0.14            | 0.35            | <b>0.74</b>     | 0.22              | <b>0.46</b>       | 0.16              | 0.27         | <b>0.70</b>     |
| <i>TC</i>         | 0.68         | 0.30        | 0.62        | 0.94        | 0.75        |             | 0.04          | 0.12           | 0.31          | <b>0.57</b>    | <b>0.48</b>   | <b>0.55</b>   | 0.31            | <b>0.64</b>     | <b>0.75</b>     | <b>0.49</b>       | <b>0.48</b>       | 0.32              | <b>0.66</b>  | <b>0.71</b>     |
| <i>ButDiA</i>     | <b>0.57</b>  | <b>0.57</b> | 0.38        | 0.17        | -0.26       | 0.03        |               | <b>0.95</b>    | <b>0.83</b>   | <b>0.40</b>    | -0.03         | -0.19         | 0.38            | 0.10            | 0.19            | 0.31              | 0.29              | -0.16             | -0.17        | 0.06            |
| <i>PentDiA</i>    | <b>0.81</b>  | <b>0.62</b> | <b>0.47</b> | 0.30        | -0.18       | 0.15        | <b>0.93</b>   |                | <b>0.85</b>   | <b>0.45</b>    | 0.04          | -0.11         | 0.38            | 0.10            | 0.20            | 0.30              | 0.22              | -0.17             | -0.12        | 0.01            |
| <i>HexDiA</i>     | <b>0.54</b>  | 0.37        | <b>0.62</b> | <b>0.42</b> | 0.04        | 0.33        | <b>0.80</b>   | <b>0.83</b>    |               | <b>0.69</b>    | 0.29          | 0.15          | 0.30            | 0.19            | <b>0.40</b>     | 0.29              | 0.36              | -0.04             | 0.17         | 0.20            |
| <i>HeptDiA</i>    | 0.24         | 0.32        | 0.30        | 0.15        | 0.03        | 0.13        | <b>0.77</b>   | <b>0.75</b>    | <b>0.69</b>   |                | <b>0.76</b>   | <b>0.68</b>   | 0.06            | 0.36            | <b>0.41</b>     | 0.08              | 0.14              | -0.14             | <b>0.65</b>  | 0.37            |
| <i>OctDiA</i>     | <b>0.51</b>  | 0.20        | <b>0.46</b> | <b>0.65</b> | <b>0.55</b> | <b>0.71</b> | 0.32          | 0.36           | <b>0.58</b>   | <b>0.51</b>    |               | <b>0.95</b>   | -0.07           | <b>0.42</b>     | 0.16            | -0.10             | -0.05             | 0.04              | <b>0.86</b>  | 0.32            |
| <i>NonDiA</i>     | 0.15         | -0.14       | 0.28        | <b>0.44</b> | 0.79        | <b>0.65</b> | -0.03         | -0.03          | 0.27          | 0.33           | <b>0.68</b>   |               | -0.12           | <b>0.44</b>     | 0.22            | -0.15             | -0.05             | 0.03              | <b>0.87</b>  | 0.38            |
| <i>1,2BZDiA</i>   | <b>0.87</b>  | <b>0.83</b> | <b>0.68</b> | <b>0.68</b> | 0.16        | <b>0.58</b> | 0.35          | <b>0.45</b>    | <b>0.40</b>   | 0.22           | 0.36          | 0.17          |                 | <b>0.69</b>     | <b>0.59</b>     | <b>0.78</b>       | <b>0.72</b>       | 0.28              | -0.04        | <b>0.41</b>     |
| <i>1,4BZDiA</i>   | 0.25         | -0.06       | 0.21        | <b>0.50</b> | <b>0.67</b> | <b>0.64</b> | -0.27         | -0.22          | -0.05         | 0.10           | <b>0.41</b>   | <b>0.73</b>   | 0.33            |                 | <b>0.71</b>     | <b>0.55</b>       | <b>0.61</b>       | 0.25              | <b>0.52</b>  | <b>0.77</b>     |
| <i>1,3BZDiA</i>   | 0.20         | -0.10       | 0.20        | <b>0.47</b> | <b>0.82</b> | <b>0.68</b> | -0.18         | -0.14          | 0.07          | 0.21           | <b>0.56</b>   | <b>0.87</b>   | 0.23            | <b>0.88</b>     |                 | <b>0.64</b>       | <b>0.79</b>       | 0.23              | 0.38         | <b>0.79</b>     |
| <i>1,2,3BZTrA</i> | <b>0.59</b>  | 0.31        | <b>0.68</b> | <b>0.76</b> | <b>0.56</b> | <b>0.79</b> | 0.14          | 0.21           | <b>0.45</b>   | 0.15           | <b>0.52</b>   | <b>0.60</b>   | <b>0.63</b>     | <b>0.45</b>     | <b>0.47</b>     |                   | <b>0.83</b>       | <b>0.42</b>       | 0.06         | <b>0.42</b>     |
| <i>1,2,4BZTrA</i> | 0.39         | 0.04        | <b>0.46</b> | <b>0.58</b> | <b>0.80</b> | <b>0.76</b> | -0.05         | 0.01           | 0.31          | 0.16           | <b>0.56</b>   | <b>0.86</b>   | 0.38            | <b>0.65</b>     | <b>0.72</b>     | <b>0.86</b>       |                   | 0.39              | 0.22         | <b>0.62</b>     |
| <i>1,3,5BZTrA</i> | 0.30         | 0.37        | 0.23        | 0.33        | -0.12       | 0.20        | 0.13          | 0.35           | 0.19          | 0.05           | 0.12          | -0.22         | <b>0.45</b>     | -0.01           | -0.17           | 0.14              | -0.08             |                   | 0.24         | 0.31            |
| <i>PimaA</i>      | 0.23         | -0.17       | 0.22        | <b>0.49</b> | <b>0.88</b> | <b>0.72</b> | -0.15         | -0.12          | 0.14          | 0.15           | <b>0.63</b>   | <b>0.86</b>   | 0.07            | <b>0.69</b>     | <b>0.80</b>     | <b>0.56</b>       | <b>0.82</b>       | -0.25             |              | <b>0.61</b>     |
| <i>IsoPimaA</i>   | 0.25         | -0.13       | 0.31        | <b>0.48</b> | <b>0.66</b> | <b>0.63</b> | -0.10         | -0.08          | 0.20          | 0.28           | <b>0.55</b>   | <b>0.80</b>   | 0.20            | <b>0.77</b>     | <b>0.71</b>     | <b>0.60</b>       | <b>0.81</b>       | -0.08             | <b>0.82</b>  |                 |

**Table S6** Correlation matrix for daily data at EROS (bottom) & CPSS (top)

|                       | <i>PM2.5</i> | <i>Cl<sup>-</sup></i> | <i>SO4</i>  | <i>NO3</i>  | <i>OC</i>    | <i>EC</i>   | <i>Si</i>   | <i>Al</i>   | <i>Fe</i>   | <i>Ti</i>   | <i>Mn</i>   | <i>Ni</i>   | <i>Cu</i>   | <i>Zn</i>   | <i>Pb</i>   | <i>Mg</i>   | <i>Ca</i>   | <i>K</i>    | <i>Na</i>    |
|-----------------------|--------------|-----------------------|-------------|-------------|--------------|-------------|-------------|-------------|-------------|-------------|-------------|-------------|-------------|-------------|-------------|-------------|-------------|-------------|--------------|
| <i>PM2.5</i>          |              | -0.31                 | <b>0.86</b> | <b>0.58</b> | <b>0.64</b>  | 0.17        | <b>0.41</b> | <b>0.41</b> | <b>0.79</b> | <b>0.45</b> | <b>0.77</b> | <b>0.63</b> | 0.13        | <b>0.65</b> | <b>0.59</b> | -0.21       | 0.35        | <b>0.56</b> | <b>-0.40</b> |
| <i>Cl<sup>-</sup></i> | -0.08        |                       | -0.32       | -0.14       | <b>-0.40</b> | -0.07       | -0.21       | -0.06       | -0.35       | -0.10       | -0.31       | -0.29       | -0.20       | -0.24       | -0.21       | <b>0.70</b> | -0.13       | 0.06        | <b>0.77</b>  |
| <i>SO4</i>            | <b>0.85</b>  | -0.28                 |             | 0.23        | 0.35         | -0.04       | 0.26        | <b>0.51</b> | <b>0.69</b> | <b>0.47</b> | <b>0.74</b> | <b>0.65</b> | -0.10       | <b>0.59</b> | <b>0.58</b> | -0.23       | 0.22        | 0.23        | -0.37        |
| <i>NO3</i>            | <b>0.80</b>  | -0.09                 | <b>0.56</b> |             | <b>0.47</b>  | 0.08        | 0.24        | 0.20        | <b>0.41</b> | 0.29        | 0.37        | 0.27        | 0.19        | 0.36        | 0.34        | -0.26       | 0.12        | <b>0.40</b> | -0.33        |
| <i>OC</i>             | <b>0.83</b>  | -0.13                 | <b>0.51</b> | <b>0.75</b> |              | 0.39        | 0.26        | 0.02        | <b>0.52</b> | 0.29        | <b>0.44</b> | 0.26        | <b>0.40</b> | <b>0.50</b> | <b>0.41</b> | -0.19       | 0.22        | <b>0.72</b> | -0.33        |
| <i>EC</i>             | 0.38         | -0.14                 | 0.04        | 0.35        | <b>0.57</b>  |             | 0.02        | -0.34       | 0.31        | 0.06        | 0.15        | -0.07       | <b>0.69</b> | <b>0.44</b> | 0.21        | 0.03        | -0.02       | <b>0.48</b> | -0.05        |
| <i>Si</i>             | <b>0.63</b>  | -0.07                 | <b>0.48</b> | <b>0.46</b> | <b>0.52</b>  | 0.31        |             | 0.36        | <b>0.61</b> | 0.17        | <b>0.50</b> | 0.29        | 0.04        | 0.14        | 0.35        | 0.09        | <b>0.93</b> | 0.35        | -0.25        |
| <i>Al</i>             | -0.01        | -0.11                 | 0.08        | -0.21       | -0.08        | -0.01       | 0.23        |             | <b>0.40</b> | 0.18        | <b>0.44</b> | 0.27        | -0.21       | 0.20        | 0.31        | -0.01       | 0.28        | 0.00        | -0.15        |
| <i>Fe</i>             | <b>0.72</b>  | -0.21                 | <b>0.56</b> | <b>0.50</b> | <b>0.69</b>  | <b>0.51</b> | <b>0.71</b> | -0.06       |             | 0.32        | <b>0.87</b> | <b>0.52</b> | 0.34        | <b>0.68</b> | <b>0.69</b> | -0.16       | <b>0.46</b> | <b>0.46</b> | <b>-0.41</b> |
| <i>Ti</i>             | 0.16         | -0.12                 | 0.14        | 0.12        | 0.12         | 0.14        | 0.09        | 0.29        | 0.07        |             | 0.27        | 0.17        | -0.14       | 0.32        | 0.32        | -0.02       | 0.18        | 0.28        | -0.14        |
| <i>Mn</i>             | 0.39         | -0.24                 | 0.35        | 0.31        | 0.38         | 0.07        | 0.32        | -0.09       | <b>0.61</b> | 0.01        |             | <b>0.61</b> | 0.06        | <b>0.66</b> | <b>0.73</b> | -0.15       | 0.37        | 0.39        | -0.36        |
| <i>Ni</i>             | 0.37         | -0.10                 | 0.22        | 0.34        | <b>0.40</b>  | 0.23        | 0.27        | -0.05       | 0.34        | 0.23        | 0.19        |             | -0.06       | 0.38        | <b>0.44</b> | -0.11       | 0.26        | 0.23        | -0.24        |
| <i>Cu</i>             | -0.05        | -0.08                 | -0.16       | -0.02       | 0.24         | <b>0.58</b> | 0.14        | 0.07        | 0.30        | -0.05       | 0.09        | -0.07       |             | 0.23        | 0.12        | -0.18       | -0.05       | 0.28        | -0.21        |
| <i>Zn</i>             | 0.30         | -0.06                 | 0.16        | 0.28        | <b>0.44</b>  | 0.22        | 0.29        | -0.12       | <b>0.55</b> | -0.02       | <b>0.80</b> | 0.14        | 0.29        |             | <b>0.70</b> | -0.18       | 0.08        | 0.37        | -0.33        |
| <i>Pb</i>             | 0.39         | 0.12                  | 0.20        | 0.24        | <b>0.48</b>  | 0.24        | <b>0.42</b> | -0.03       | <b>0.52</b> | -0.06       | <b>0.42</b> | 0.08        | 0.28        | <b>0.63</b> |             | 0.01        | 0.27        | 0.39        | -0.18        |
| <i>Mg</i>             | 0.00         | <b>0.70</b>           | -0.16       | -0.21       | 0.00         | -0.10       | 0.15        | 0.06        | 0.12        | -0.19       | -0.04       | 0.00        | 0.07        | 0.22        | <b>0.43</b> |             | 0.23        | 0.25        | <b>0.93</b>  |
| <i>Ca</i>             | <b>0.54</b>  | 0.03                  | <b>0.40</b> | 0.26        | <b>0.45</b>  | 0.12        | 0.33        | 0.06        | <b>0.44</b> | -0.08       | 0.13        | 0.36        | -0.24       | 0.16        | 0.34        | 0.39        |             | 0.31        | -0.10        |
| <i>K</i>              | 0.19         | <b>0.54</b>           | 0.00        | -0.01       | 0.27         | 0.12        | 0.33        | 0.17        | 0.25        | -0.10       | 0.01        | 0.01        | 0.29        | 0.27        | <b>0.59</b> | <b>0.76</b> | 0.28        |             | 0.07         |
| <i>Na</i>             | -0.19        | <b>0.72</b>           | -0.29       | -0.30       | -0.21        | -0.23       | -0.09       | -0.06       | -0.06       | -0.23       | -0.08       | 0.00        | -0.10       | 0.10        | 0.18        | <b>0.91</b> | 0.31        | <b>0.49</b> |              |

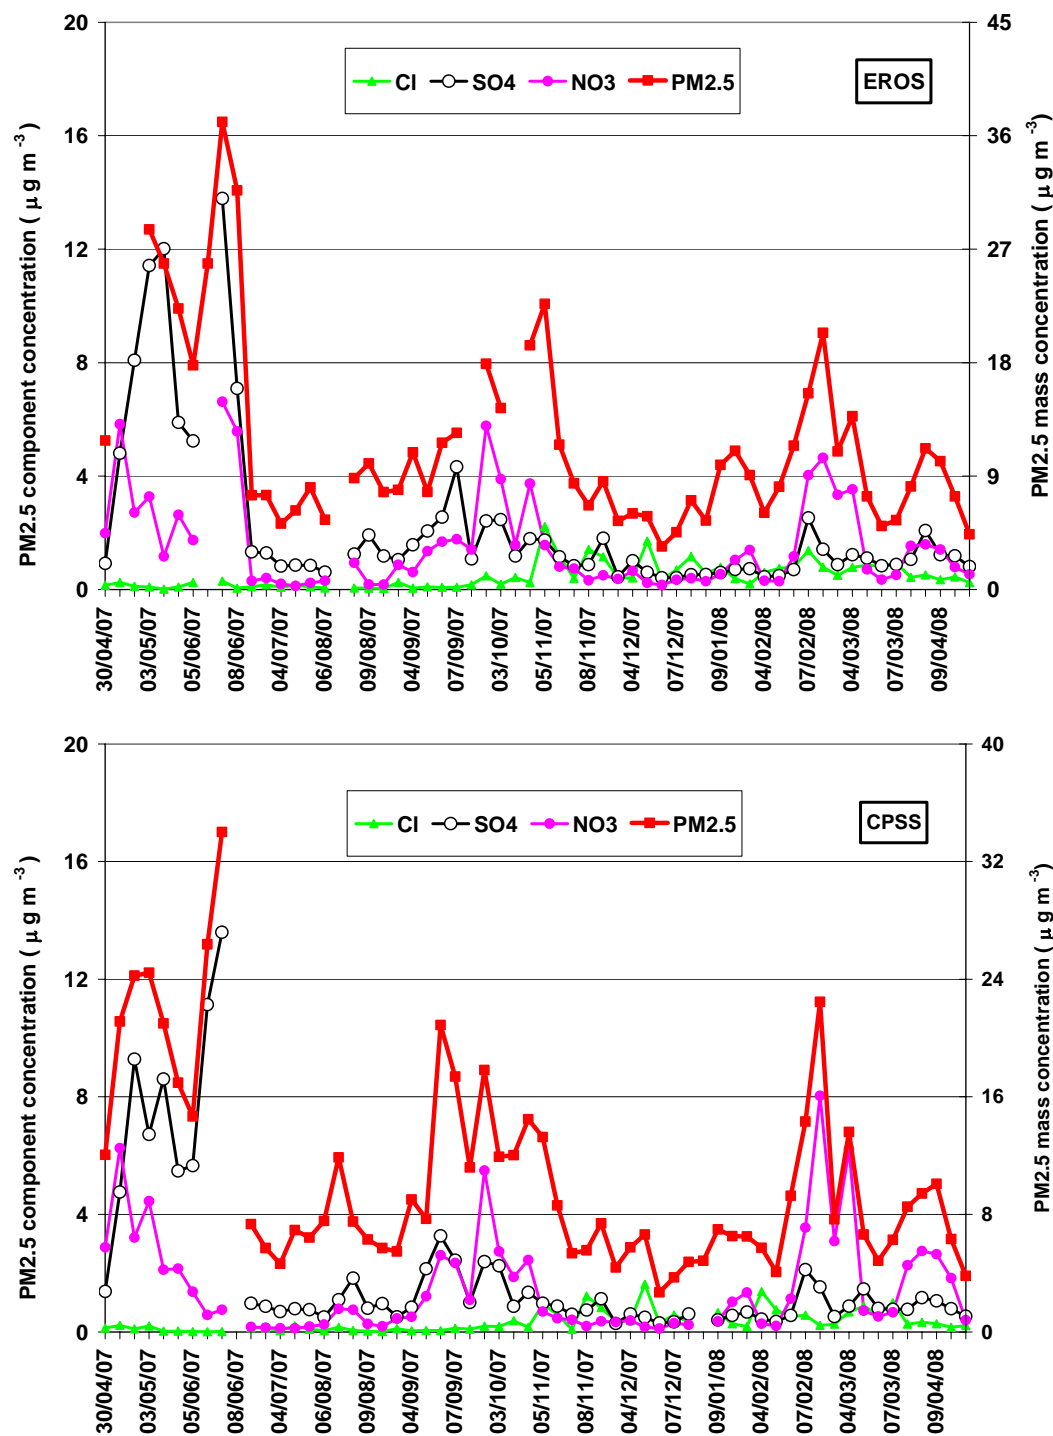

Figure S1. Daily variations for PM<sub>2.5</sub>, chloride, nitrate and sulphate at EROS and CPSS



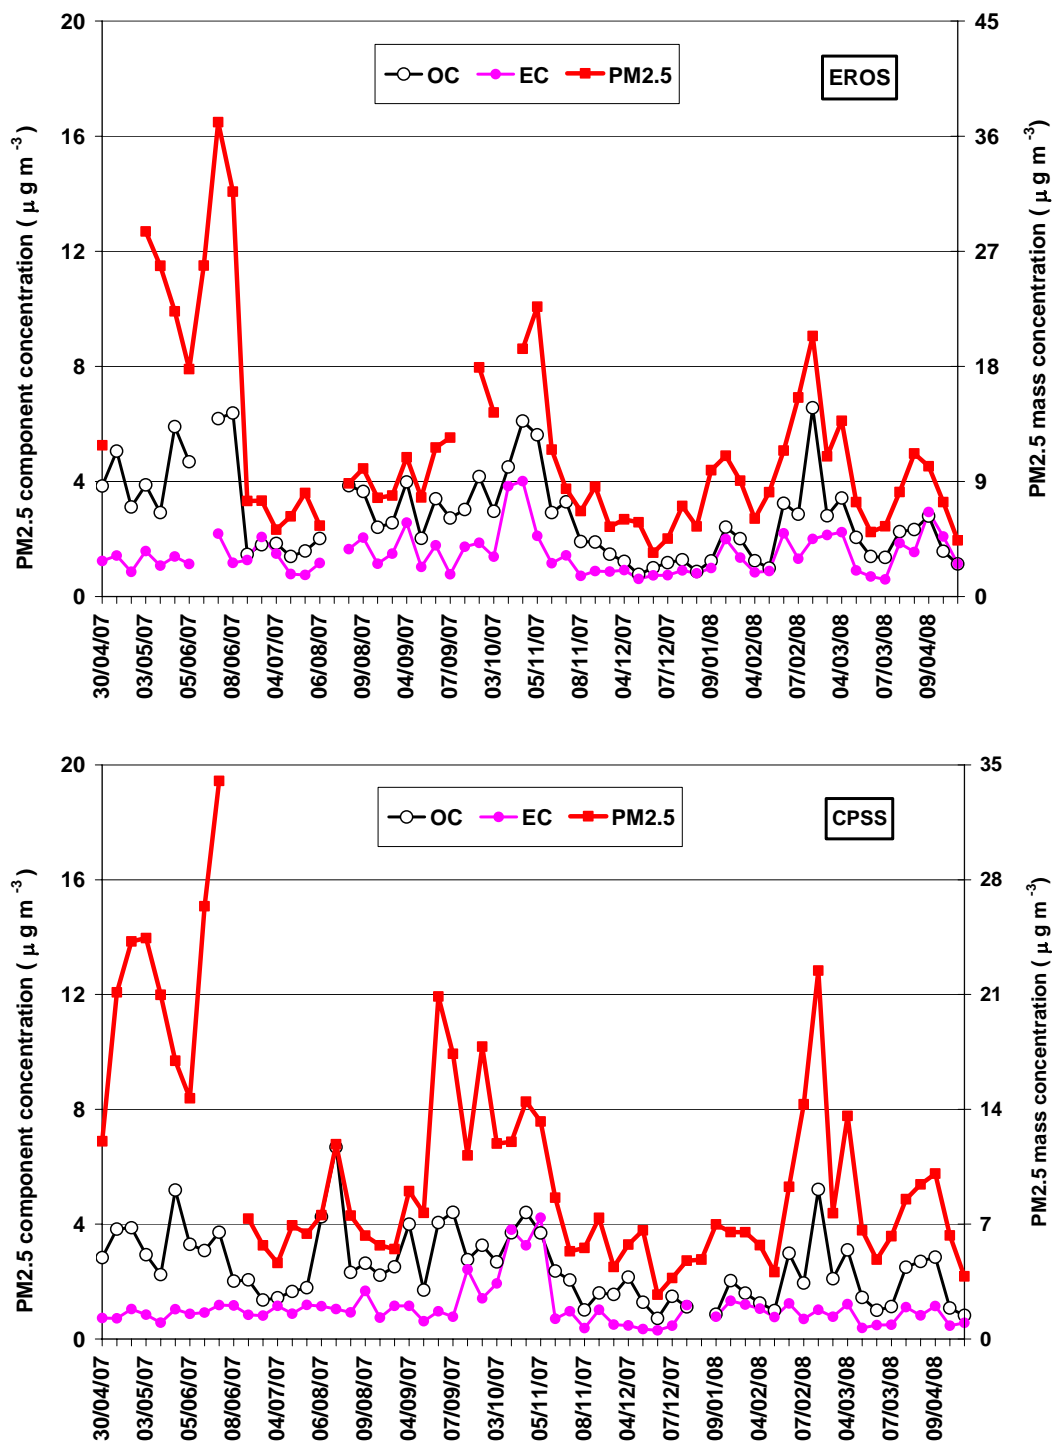

Figure S2. Daily variations for  $\text{PM}_{2.5}$ , EC and OC at EROS and CPSS
